# Supplementary material
Source: PubMed Central journal article supplement (PMC2978572)
Supplement: supp_M110.143263_jbc.M110.143263-1.pdf [file supp_M110.143263_jbc.M110.143263-1.pdf]

SUPPLEMENTAL DATA

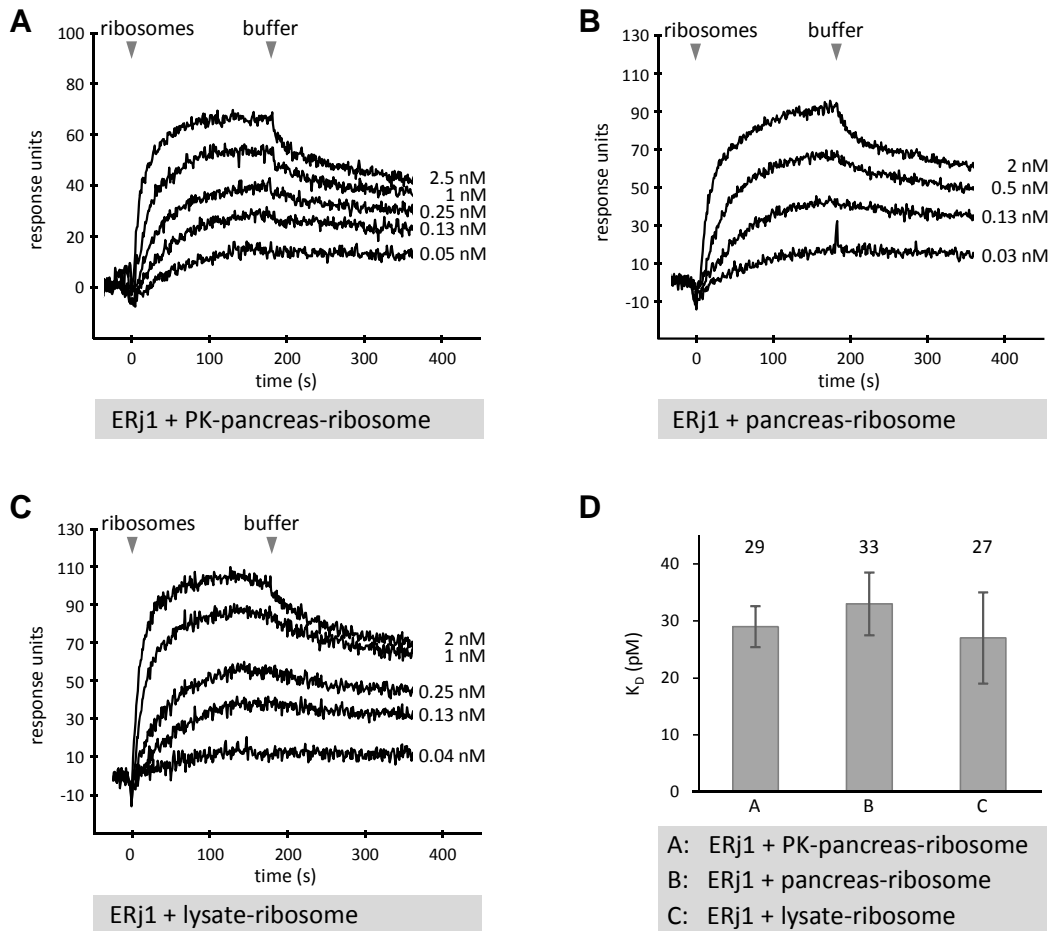

**Fig. S1.** SPR analysis of the ERj1/ribosome interaction with different ribosomes. GST-ERj1 (A, B, C) was immobilized on an activated sensor chip CM5 in the measuring cell. Increasing concentrations of canine pancreatic ribosomes either washed with puromycin and high salt (PK-pancreas-ribosome) (A) or left untreated (pancreas-ribosome) (B) or rabbit reticulocyte lysate ribosomes (lysate-ribosome) (C) were passed over the chip and followed by buffer application. D, Summary of the SPR measurements obtained using different ribosomes. The  $K_D$  values and the s.e.m. are indicated;  $n=3$  for each type of ribosomes.

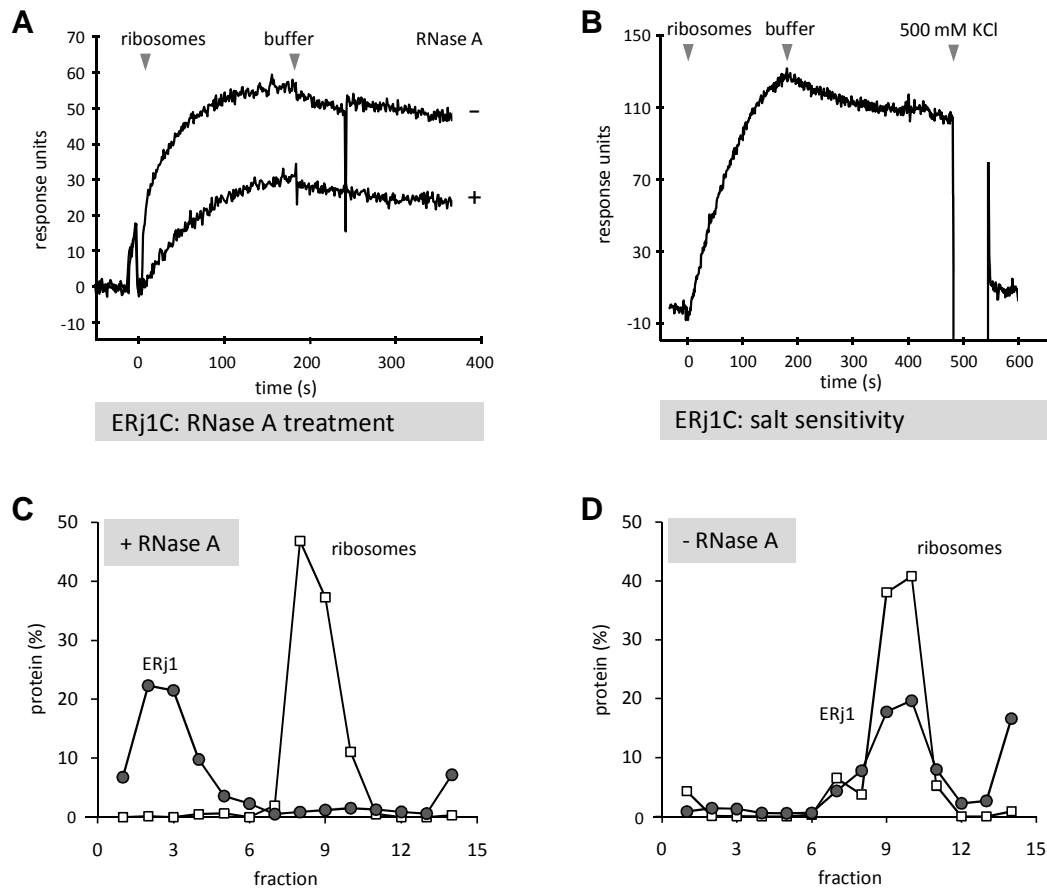

**Fig. S2.** SPR analysis of the ERj1/ribosome interaction. GST-ERj1C (*A*, *B*) was immobilized on an activated sensor chip CM5 in the measuring cell. *A*, ribosomes or ribosomes pretreated with RNase A (80  $\mu\text{g/ml}$ ) were passed over the chip. *B*, ribosomes were passed over the chip. Where indicated, the chip was washed by application of high-salt buffer. *C* and *D*, ERj1-6His was incubated in the presence of ribosomes pretreated with buffer (*C*) or RNase A in buffer (80  $\mu\text{g/ml}$ ) (*D*). Subsequently, the samples were subjected to sucrose gradient centrifugation. The resulting fractions were analyzed by SDS-PAGE and subsequent western blotting plus immunodetection with anti-His (filled circles) and anti-L4 (open squares) antibodies. The western blot signals were quantified by luminescence imaging and plotted against the fraction number.
